# Supplementary material for: The lncRNA PVT1 regulates nasopharyngeal carcinoma cell proliferation via activating the KAT2A acetyltransferase and stabilizing HIF-1α
Source: PubMed Central journal article supplement (PMC7206084; doi:10.1038/s41418-019-0381-y), 2019-07-18
Supplement: 41418_2019_381_MOESM1_ESM.pdf [file 41418_2019_381_MOESM1_ESM.pdf]

A

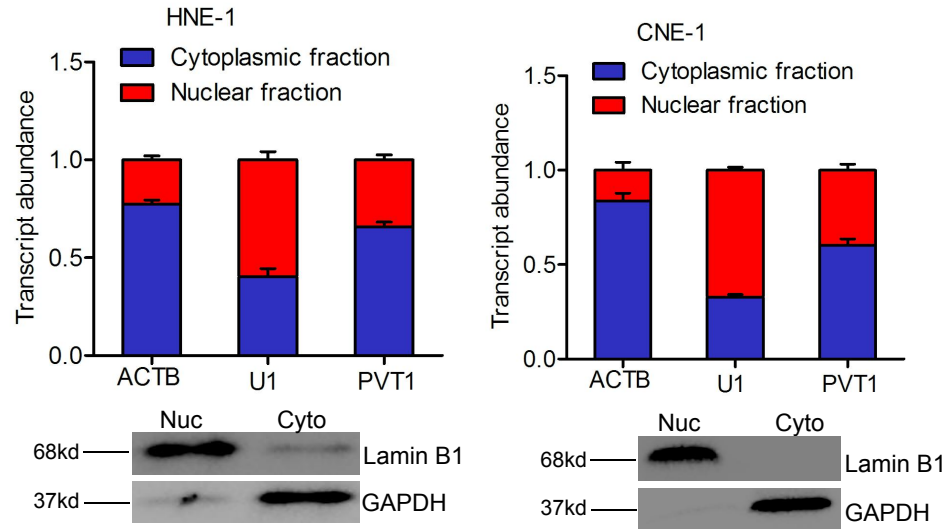

B

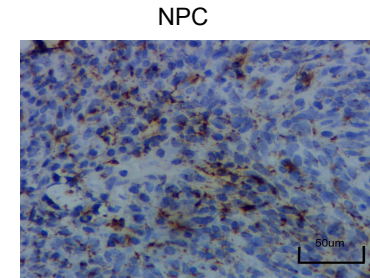

**Supplementary Figure 1. PVT1 localization in NPC cells.** **A**, Real-time PCR analysis of the subcellular location of PVT1 in NPC cells. U1 snRNA (nuclear retained) and ACTB mRNAs (exported to cytoplasm) were used as controls. **B**, Representative images of PVT1 expression in clinical NPC tissues using RNAscope analysis.
