# Supplementary material for: The lncRNA PVT1 regulates nasopharyngeal carcinoma cell proliferation via activating the KAT2A acetyltransferase and stabilizing HIF-1α
Source: PubMed Central journal article supplement (PMC7206084; doi:10.1038/s41418-019-0381-y), 2019-07-18
Supplement: 41418_2019_381_MOESM2_ESM.pdf [file 41418_2019_381_MOESM2_ESM.pdf]

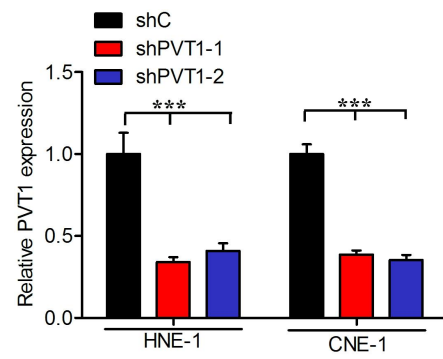

**Supplementary Figure 2. Effects of shRNA knockdown on PVT1 mRNA expression in HNE-1 and CNE-1 NPC cells.** Error bars  $\pm$ SD. \*\*\*P < 0.001. Data are representative from three independent experiments.
