# Supplementary material for: The lncRNA PVT1 regulates nasopharyngeal carcinoma cell proliferation via activating the KAT2A acetyltransferase and stabilizing HIF-1α
Source: PubMed Central journal article supplement (PMC7206084; doi:10.1038/s41418-019-0381-y), 2019-07-18
Supplement: 41418_2019_381_MOESM3_ESM.pdf [file 41418_2019_381_MOESM3_ESM.pdf]

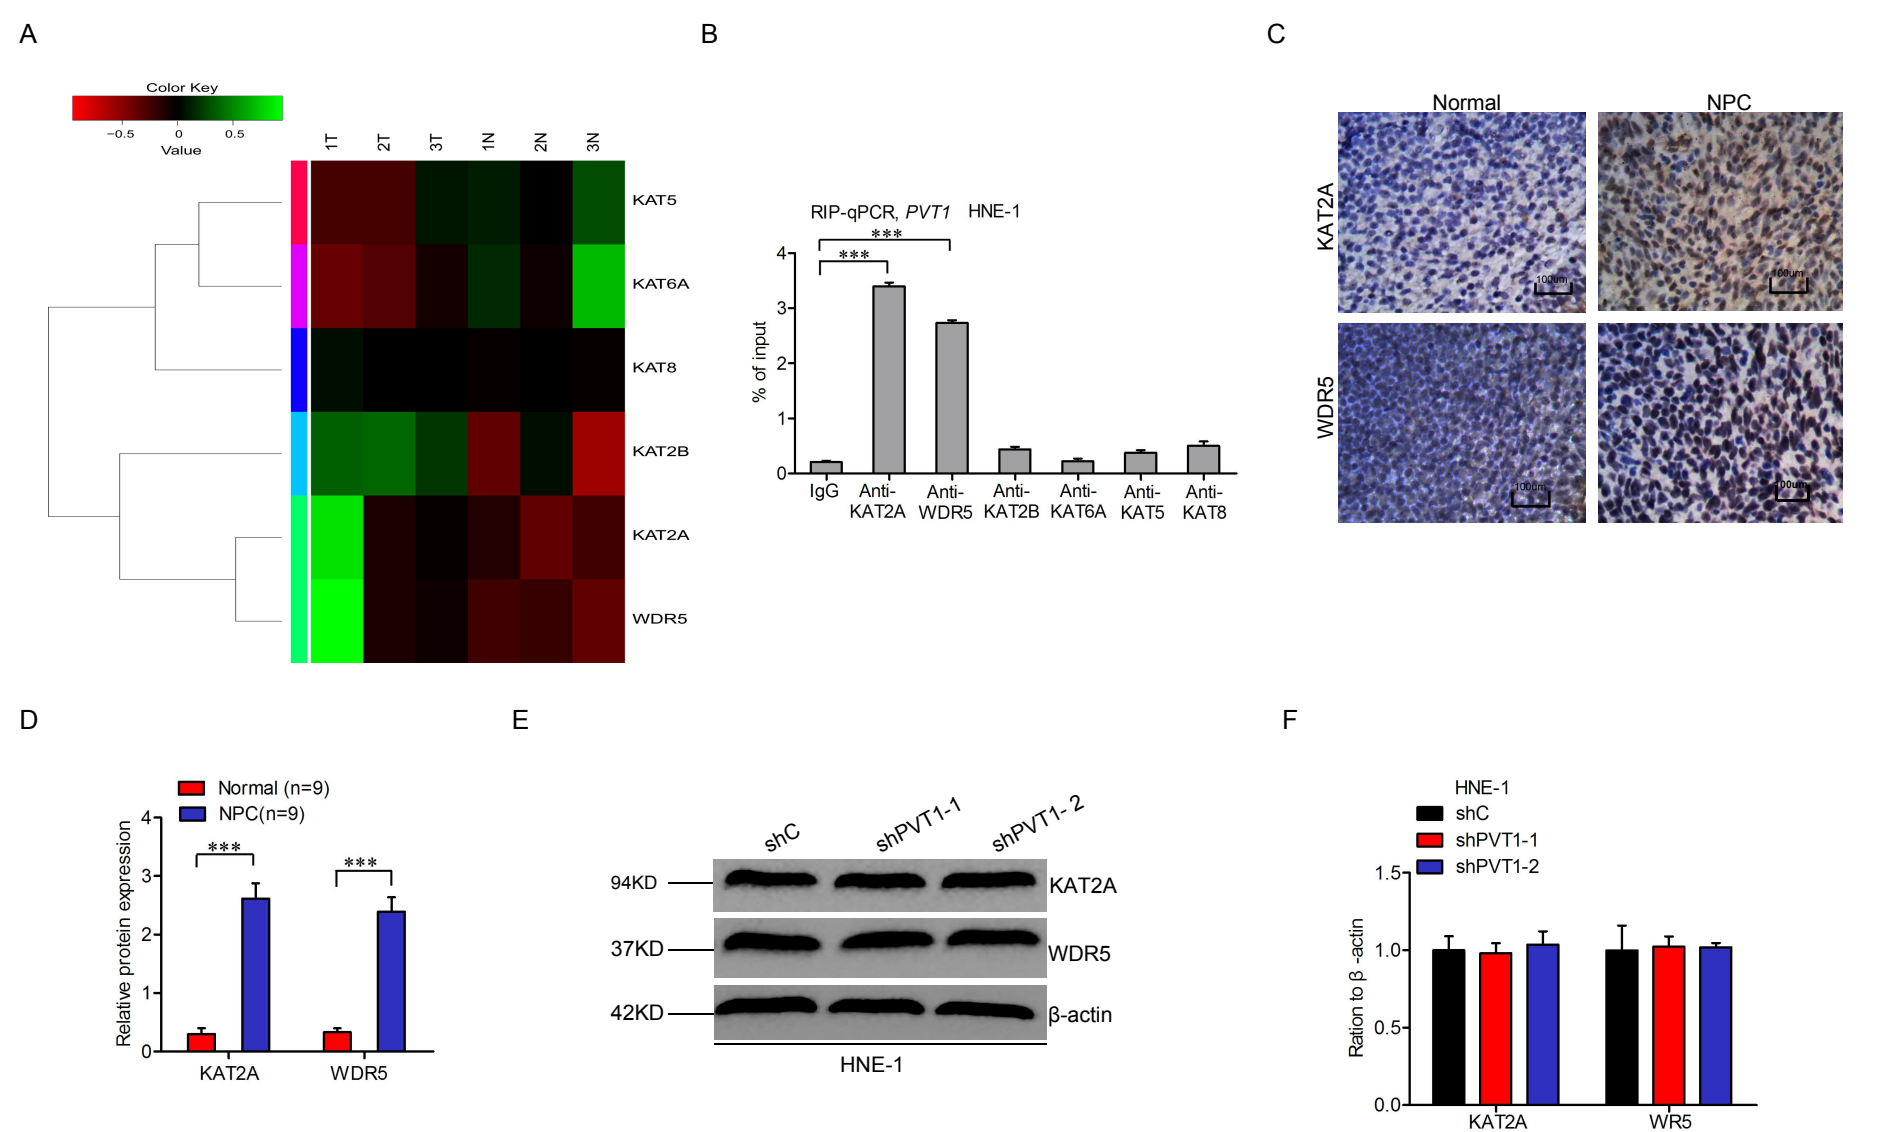

**Supplementary Figure 3. PVT1 binds with KAT2A and WDR5 in NPC cells.** **A**, Heatmap illustrating the 6 differentially expressed genes between 3 freshly-frozen normal nasopharyngeal specimens and 3 clinical tumors of NPC patients (fold change  $\geq 1.5$ , P-value  $< 0.05$ ). **B**, Effects of the association of KAT2A, WDR5, KAT2B, KAT6A, KAT5 or KAT8, and PVT1. **C**, Immunohistochemistry staining assay of KAT2A and WDR5 in 9 normal nasopharyngeal specimens and 9 clinical NPC tumors. **D**, Quantification analysis of KAT2A and WDR5 in **C**. **E**, Effects of PVT1 knockdown on KAT2A and WDR5 expression. **F**, Quantification analysis of KAT2A and WDR5 in **E**. Error bars  $\pm$  SD. \*\*\*P  $< 0.001$ . Data are representative from three independent experiments.
