# Supplementary material for: The lncRNA PVT1 regulates nasopharyngeal carcinoma cell proliferation via activating the KAT2A acetyltransferase and stabilizing HIF-1α
Source: PubMed Central journal article supplement (PMC7206084; doi:10.1038/s41418-019-0381-y), 2019-07-18
Supplement: 41418_2019_381_MOESM4_ESM.pdf [file 41418_2019_381_MOESM4_ESM.pdf]

A

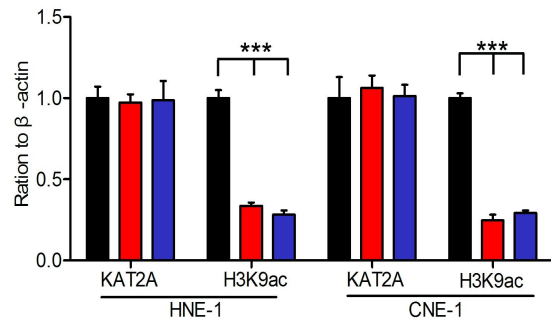

B

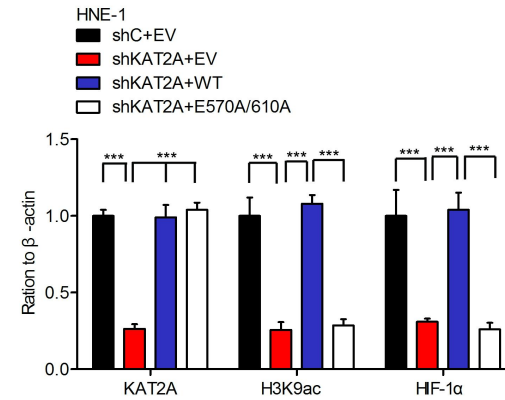

C

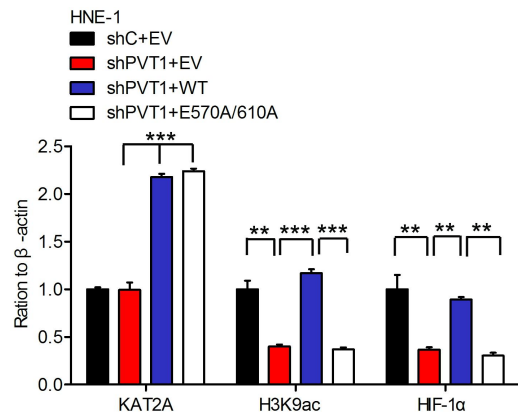

D

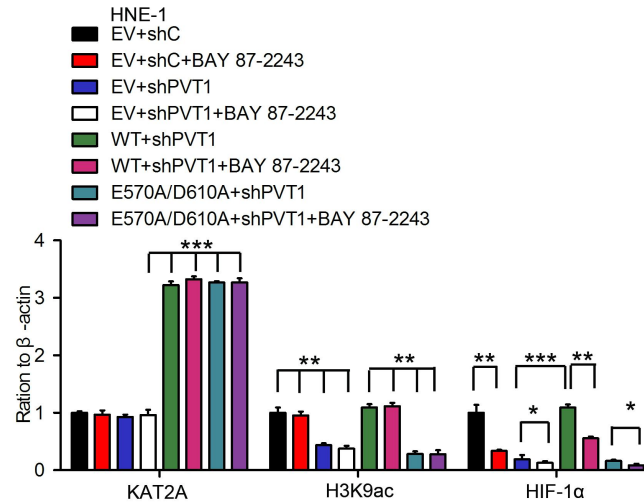

**Supplementary Figure 4. A.** Quantification analysis of KAT2A and H3K9ac in **Figure6A**. **B.** Quantification analysis of KAT2A, H3K9ac and HIF-1 $\alpha$  in **Figure6B**. **C.** Quantification analysis of KAT2A, H3K9ac and HIF-1 $\alpha$  in **Figure6C**. **D.** Quantification analysis of KAT2A, H3K9ac and HIF-1 $\alpha$  in **Figure6F**. Error bars  $\pm$ SD. \*\*P<0.01. \*\*\*P <0.001. Data are representative from three independent experiments.
