# Supplementary material for: The lncRNA PVT1 regulates nasopharyngeal carcinoma cell proliferation via activating the KAT2A acetyltransferase and stabilizing HIF-1α
Source: PubMed Central journal article supplement (PMC7206084; doi:10.1038/s41418-019-0381-y), 2019-07-18
Supplement: 41418_2019_381_MOESM5_ESM.pdf [file 41418_2019_381_MOESM5_ESM.pdf]

A

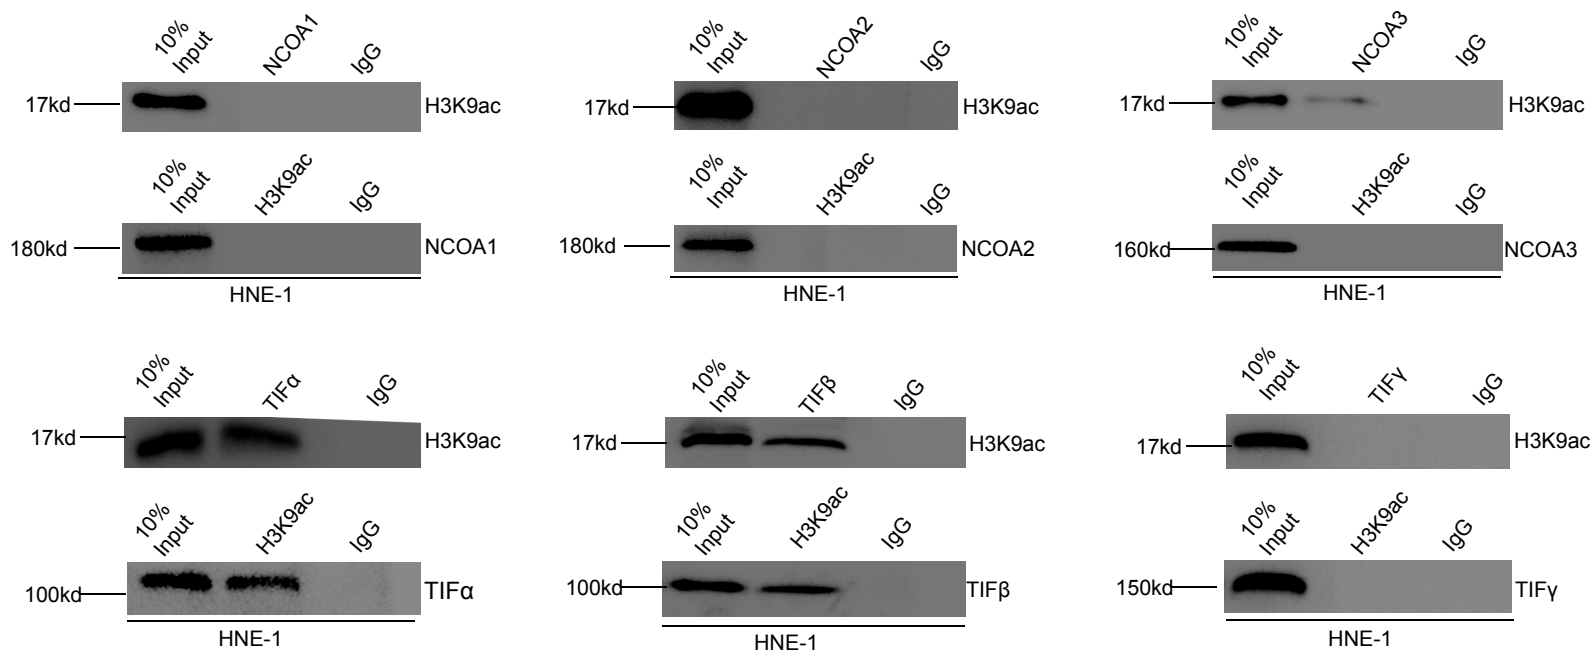

B

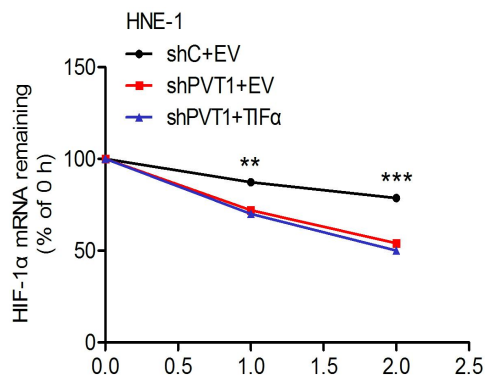

C

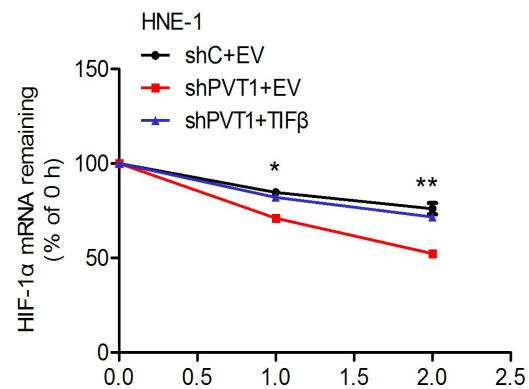

**Supplementary Figure 5. PVT1 regulates HIF-1 $\alpha$  through binding TIF1 $\beta$ .** **A**, Immunoprecipitation and WB analyses of effects of H3K9ac association with NCOA1, NCOA2, NCOA3, TIF1 $\alpha$ , TIF1 $\beta$ , and TIF1 $\gamma$ . **B-C**, TIF1 $\beta$  but not TIF1 $\alpha$  rescues PVT1 knockdown-inhibited HIF-1 $\alpha$  mRNA stability. Error bars  $\pm$  SD. \* $P$ <0.05. \*\* $P$ <0.01. \*\*\* $P$ <0.001. Data are representative from three independent experiments.
