# Supplementary material for: The lncRNA PVT1 regulates nasopharyngeal carcinoma cell proliferation via activating the KAT2A acetyltransferase and stabilizing HIF-1α
Source: PubMed Central journal article supplement (PMC7206084; doi:10.1038/s41418-019-0381-y), 2019-07-18
Supplement: 41418_2019_381_MOESM6_ESM.pdf [file 41418_2019_381_MOESM6_ESM.pdf]

A

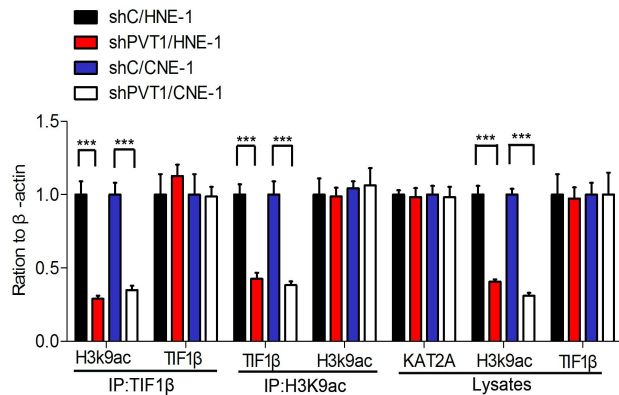

B

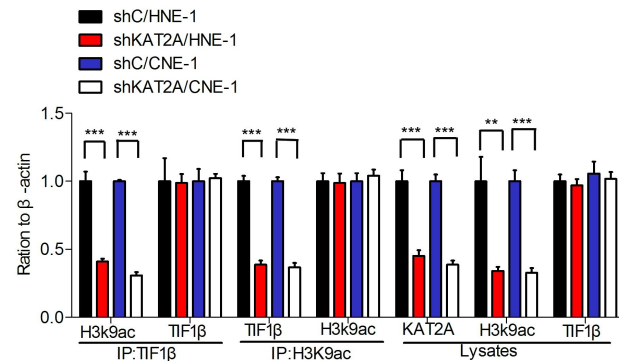

C

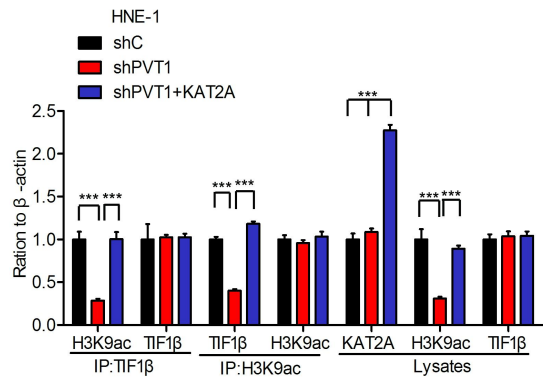

D

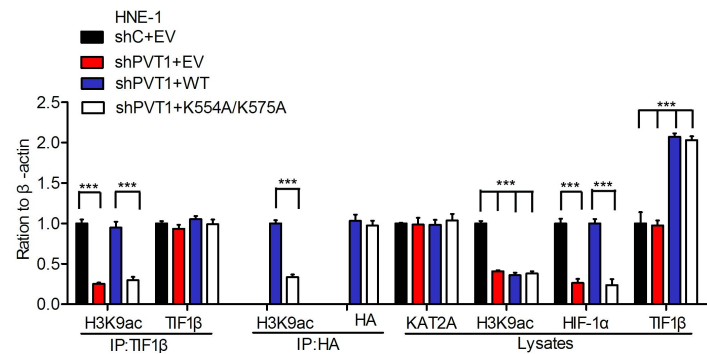

E

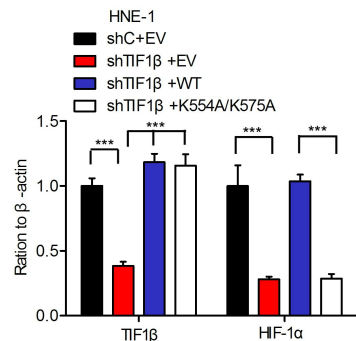

F

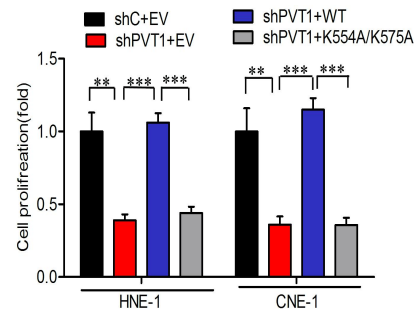

G

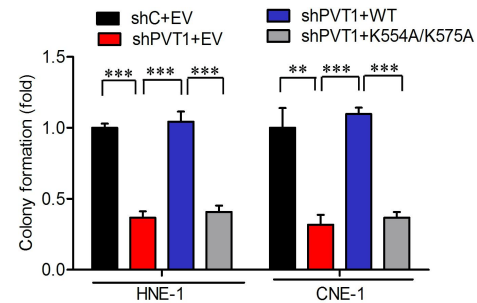

**Supplementary Figure 6.** A. Quantification analysis of **Figure 7A**. B. Quantification analysis of **Figure 7B**. C. Quantification analysis of **Figure 7C**. D. Quantification analysis of **Figure 7D**. E. Quantification analysis of **Figure 7E**. F. Representation of overexpression of TIF1 $\beta$  wild type but not K554A/K575A mutant on PVT1 knockdown-inhibited cell proliferation (F) and colony formation (G). Error bars  $\pm$ SD. \*\*P<0.01. \*\*\*P<0.001. Data are representative from three independent experiments.
