# Supplementary material for: The lncRNA PVT1 regulates nasopharyngeal carcinoma cell proliferation via activating the KAT2A acetyltransferase and stabilizing HIF-1α
Source: PubMed Central journal article supplement (PMC7206084; doi:10.1038/s41418-019-0381-y), 2019-07-18
Supplement: 41418_2019_381_MOESM7_ESM.pdf [file 41418_2019_381_MOESM7_ESM.pdf]

A

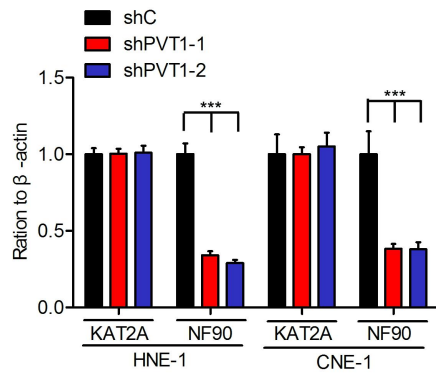

B

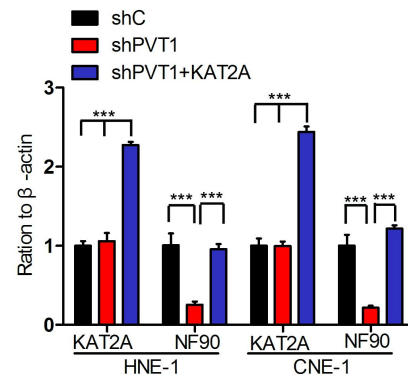

C

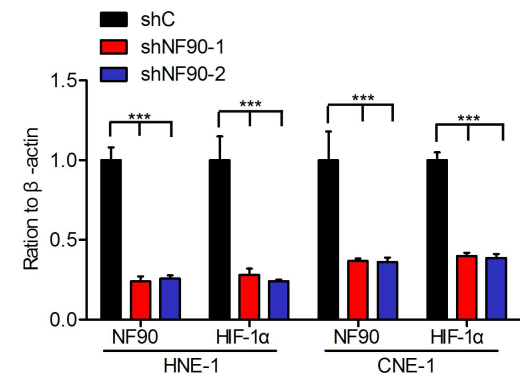

D

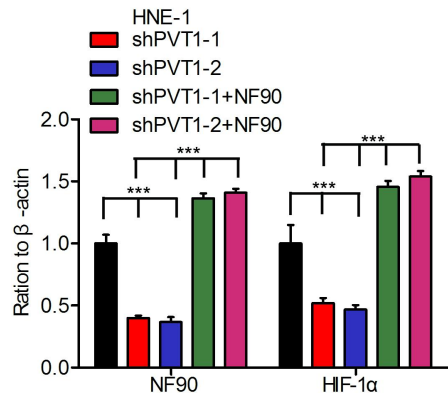

E

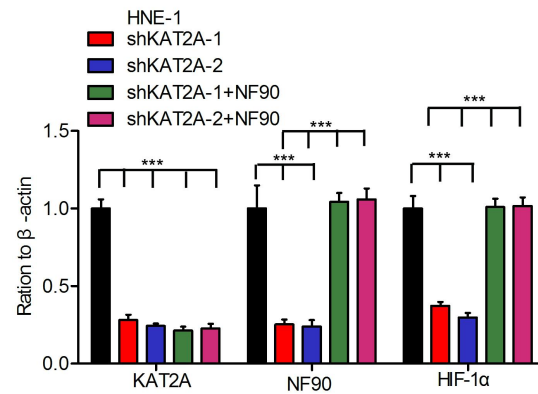

F

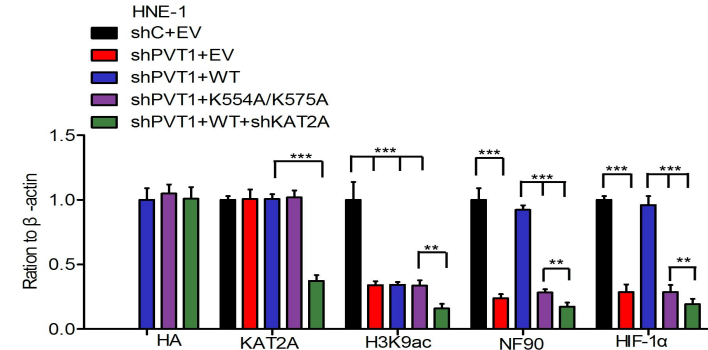

**Supplementary Figure 7. A.** Quantification analysis of **Figure 8A**. **B.** Quantification analysis of **Figure 8C**. **C.** Quantification analysis of **Figure 8F**. **D.** Quantification analysis of **Figure 8H**. **E.** Quantification analysis of **Figure 8I**. **F.** Quantification analysis of **Figure 8J**. Error bars  $\pm$ SD. \*\*\*P < 0.001. Data are representative from three independent experiments.
