# Supplementary material for: The lncRNA PVT1 regulates nasopharyngeal carcinoma cell proliferation via activating the KAT2A acetyltransferase and stabilizing HIF-1α
Source: PubMed Central journal article supplement (PMC7206084; doi:10.1038/s41418-019-0381-y), 2019-07-18
Supplement: 41418_2019_381_MOESM8_ESM.pdf [file 41418_2019_381_MOESM8_ESM.pdf]

A

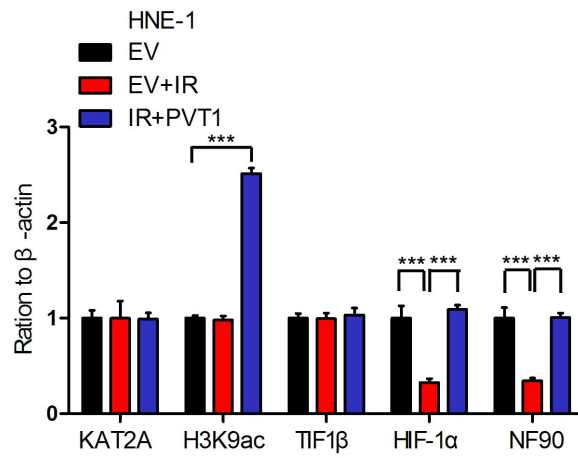

B

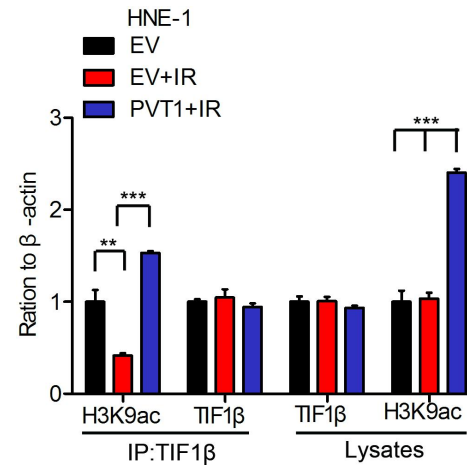

**Supplementary Figure 8. A.** Quantification analysis of **Figure9J**. **B.** Quantification analysis of **Figure9L**. Error bars  $\pm$ SD. \*\*P<0.01. \*\*\*P<0.001. Data are representative from three independent experiments.
